# Supplementary material for: Mass balance, metabolic disposition, and pharmacokinetics of a single IV dose of [14C]CA102N in HT-29 xenograft athymic nude mice
Source: PubMed Central journal article supplement (PMC11655901; doi:10.3389/fphar.2024.1440679), 2024-12-05
Supplement: DataSheet1.pdf [file DataSheet1.pdf]

## *Supplementary Material*

### **1 Supplementary Figures and Tables**

#### **1.1 Supplementary Figures.**

Supplementary Figure 1. CA102N, Nim and H-Nim Chemical Structures

Supplementary Figure 2. Representative radio-chromatograms of Pre-dose and Post-dose of [14C]CA102N

Supplementary Figure 3. The concentrations-time course of [14C] CA102N and related molecules in various tissues

Supplementary Figure 4. LC-MS/MS identification of CA102N metabolites in urine (S4A and E), feces(S4B) and liver extracts (4C) or tumor(4D)

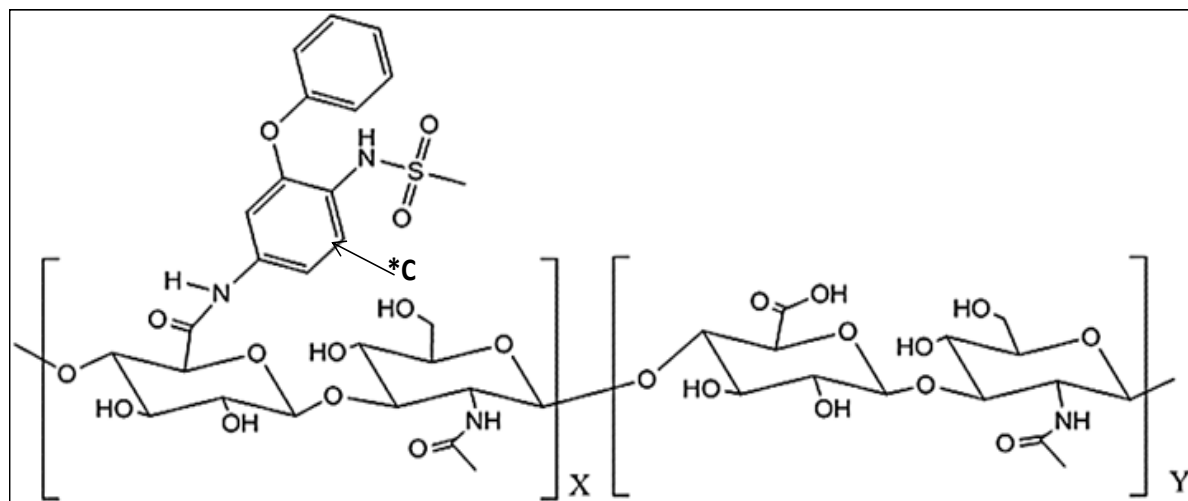

Nimesulide

H-Nim

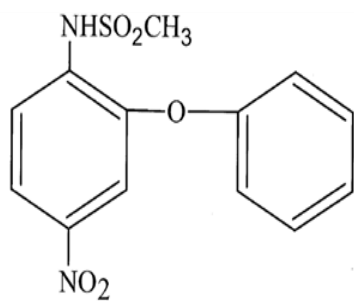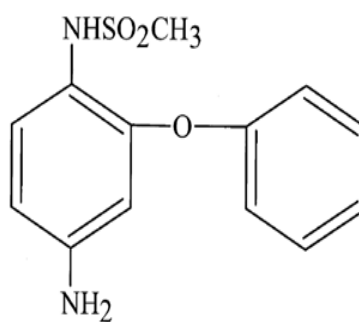

### Supplementary Figure 1. CA102N, Nim and H-Nim Chemical Structures

X = number of hyaluronate carboxyl groups substituted with Nimesulide (Degree of Substitution) Y = number of unsubstituted hyaluronate disaccharides, Molecular Formula:  $(C_{27}H_{33}N_3O_{13}S)_x - (C_{14}H_{21}NO_{11})_y$ , Molecular Weight: about 150 kDa.

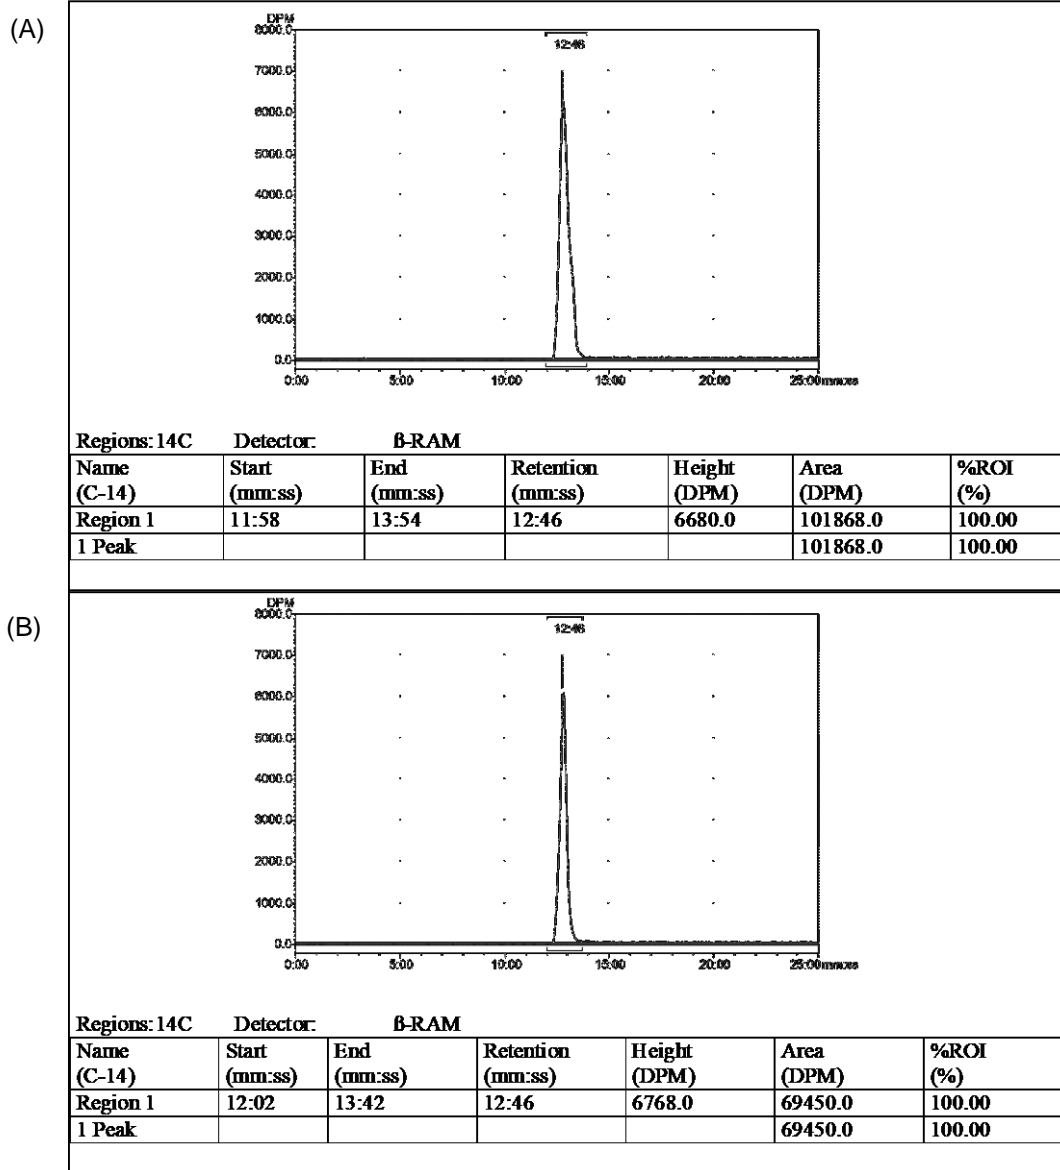

**Supplementary Figure 2. Representative radio-chromatograms of Pre-dose and Post-dose of [14C]CA102N.**

The radiopurity, homogeneity, and stability of the dosing formulation were assessed by analyzing a pre- and post-dose aliquot (23.5  $\mu$ L) of the dosing formulation that was diluted to 1 mL with DPBS using the radio-HPLC method.

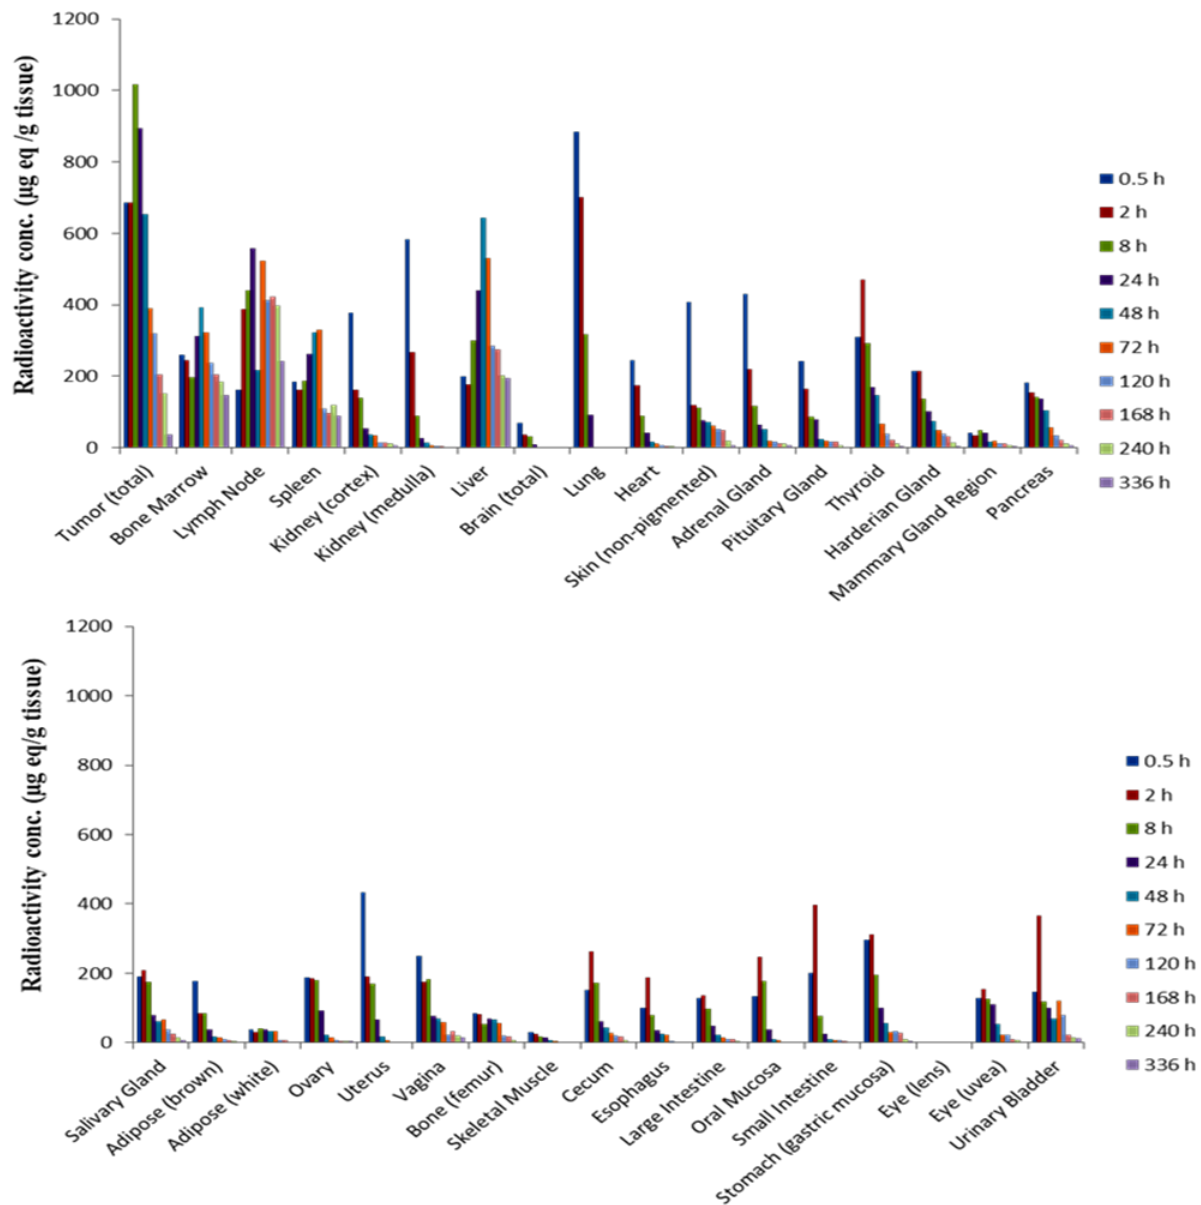

**Supplementary Figure 3. The concentrations-time course of [14C] CA102N and related molecules in various tissues.**

The concentration-time course of total radioactivity was measured in various tissues of female BALB/c Athymic (nu+/nu+) mice at 0.5, 2, 8, 24, 48.72, 120, 168, 240, and 336 hours following a single IV dose of 200 mg/kg (n = 1 per time point). The data indicate accumulation and retention of CA102N and its metabolites in specific tissues after administration, suggesting prolonged retention in target tissues, particularly tumors.

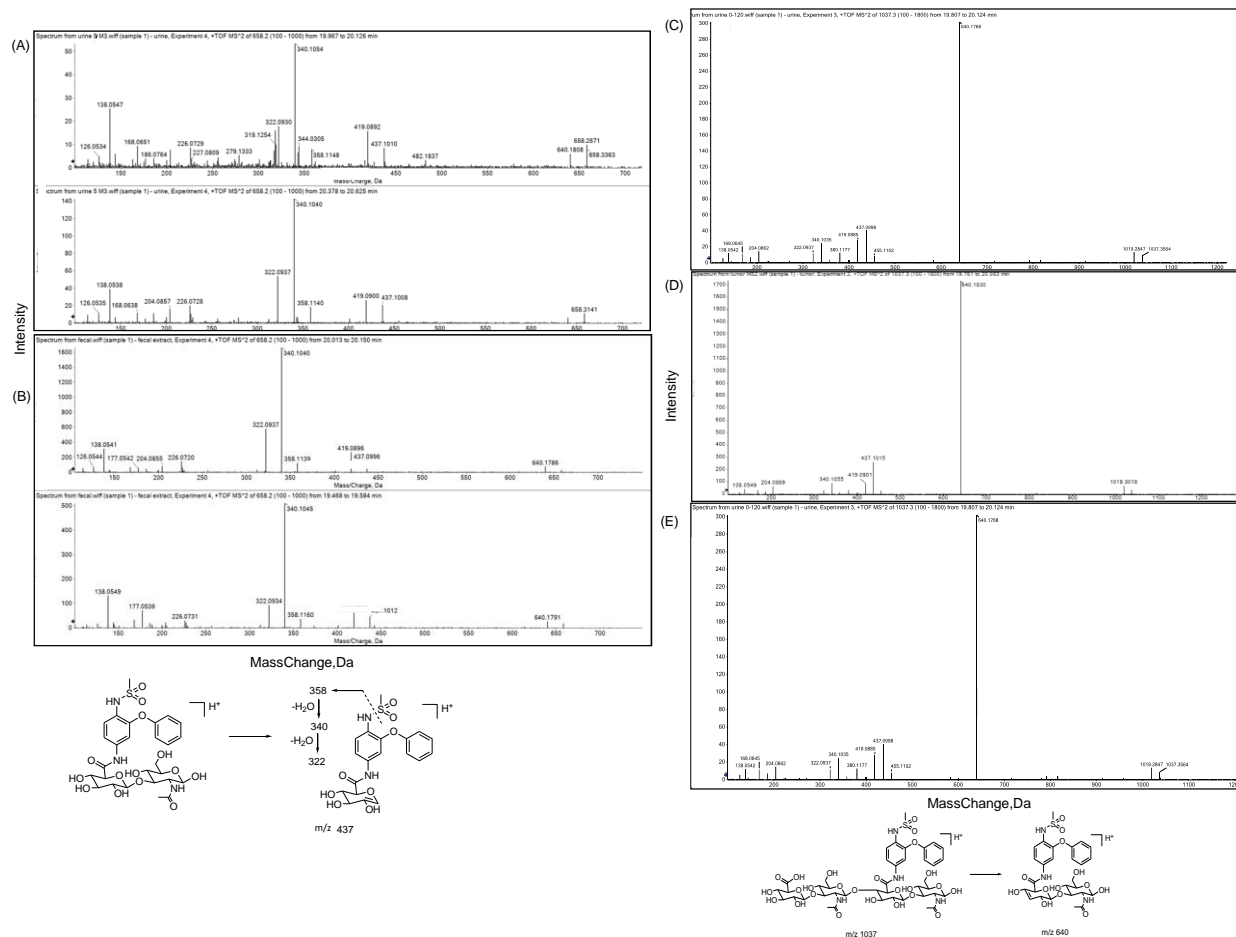

**Supplementary Figure 4. LC-MS/MS identification of CA102N metabolites in urine (S4A and E), feces(S4B), and liver extracts (4C) or tumor(4D).**

Two key metabolites, H-Nim tetrasaccharide (m/z 1037) and Nim-disaccharide (m/z 640) were detected in the pooled mouse urine, Nim-disaccharide (m/z 640) in fecal samples, while in liver and tumor extracts at 240 hours post-dose H-Nim tetrasaccharide (m/z 1037) was detected. The product ion spectrum further confirmed the identity of these metabolites, indicating the breakdown products of CA102N in vivo.

## 1.2 Supplementary Tables

Supplementary Table 1. Tissue-to-blood ratio measured in various tissues

**Supplementary Table 1. Tissue-to-blood ratio measured in various tissues at different time points following a single 200 mg/kg IV bolus dose of CA102N**

| Tissue Type          | Tissue                     | 0.5 h   | t/b <sub>0.5</sub> | 8 h     | t/b <sub>8</sub> | 24 h   | t/b <sub>24</sub> | 48h    | t/b <sub>48</sub> |
|----------------------|----------------------------|---------|--------------------|---------|------------------|--------|-------------------|--------|-------------------|
| Vascular/ Lymphatic  | Blood (cardiac)            | 1458.13 | 1.00               | 552.12  | 1.00             | 119.50 | 1.00              | 1.50   | 1.00              |
|                      | Bone Marrow                | 260.58  | 0.18               | 196.36  | 0.36             | 313.36 | <b>2.62</b>       | 393.32 | <b>3.29</b>       |
|                      | Lymph Node                 | 162.05  | 0.11               | 440.87  | 0.80             | 557.33 | <b>4.66</b>       | 216.96 | <b>1.82</b>       |
|                      | Spleen                     | 185.07  | 0.13               | 186.54  | 0.34             | 263.57 | <b>2.21</b>       | 322.28 | <b>2.70</b>       |
| Excretory/ Metabolic | Kidney (cortex)            | 378.46  | 0.26               | 140.46  | 0.25             | 55.47  | 0.46              | 36.30  | 0.30              |
|                      | Kidney (medulla)           | 582.84  | 0.40               | 88.59   | 0.16             | 27.29  | 0.23              | 13.79  | 0.12              |
|                      | Liver                      | 199.26  | 0.14               | 299.67  | 0.54             | 441.21 | <b>3.69</b>       | 642.95 | <b>5.38</b>       |
|                      | Urinary Bladder            | 146.49  | 0.10               | 119.26  | 0.22             | 101.07 | 0.85              | 70.29  | 0.59              |
|                      | Urinary Bladder (contents) | 8984.37 | <b>6.16</b>        | 1178.97 | <b>2.14</b>      | 615.56 | 5.15              | 49.77  | 0.42              |
| Endocrine            | Adrenal Gland              | 429.98  | 0.29               | 116.47  | 0.21             | 64.39  | 0.54              | 50.89  | 0.43              |
|                      | Pituitary Gland            | 242.97  | 0.17               | 86.17   | 0.16             | 78.75  | 0.66              | 25.20  | 0.21              |
|                      | Thyroid                    | 310.17  | 0.21               | 293.69  | 0.53             | 168.49 | 1.41              | 146.18 | 1.22              |
| Secretory            | Harderian Gland            | 215.77  | 0.15               | 137.01  | 0.25             | 101.75 | 0.85              | 74.48  | 0.62              |
|                      | Mammary Gland Region       | 41.26   | 0.03               | 48.17   | 0.09             | 41.34  | 0.35              | 16.54  | 0.14              |
|                      | Pancreas                   | 182.22  | 0.12               | 142.54  | 0.26             | 137.93 | <b>1.15</b>       | 103.53 | 0.87              |
|                      | Salivary Gland             | 191.55  | 0.13               | 174.95  | 0.32             | 78.50  | 0.66              | 61.88  | 0.52              |
| Fatty                | Adipose (brown)            | 177.69  | 0.12               | 84.25   | 0.15             | 37.83  | 0.32              | 16.73  | 0.14              |

|                   |                            |        |      |        |      |        |             |        |      |
|-------------------|----------------------------|--------|------|--------|------|--------|-------------|--------|------|
|                   | Adipose (white)            | 37.69  | 0.03 | 40.06  | 0.07 | 38.71  | 0.32        | 33.67  | 0.28 |
| Dermal            | Skin (non-pigmented)       | 407.67 | 0.28 | 112.25 | 0.20 | 77.17  | 0.65        | 71.93  | 0.60 |
| Reproductive      | Ovary                      | 188.87 | 0.13 | 180.77 | 0.33 | 91.37  | 0.76        | 23.01  | 0.19 |
|                   | Uterus                     | 432.78 | 0.30 | 169.95 | 0.31 | 66.05  | 0.55        | 17.70  | 0.15 |
|                   | Vagina                     | 249.67 | 0.17 | 182.17 | 0.33 | 76.75  | 0.64        | 69.95  | 0.59 |
| Muscular          | Heart (myocardium)         | 246.03 | 0.17 | 88.89  | 0.16 | 42.59  | 0.36        | 16.04  | 0.13 |
| Respiratory Tract | Lung                       | 885.00 | 0.61 | 316.66 | 0.57 | 92.67  | 0.78        | 2.65   | 0.02 |
| Alimentary Canal  | Cecum                      | 153.07 | 0.10 | 173.46 | 0.31 | 62.67  | 0.52        | 44.12  | 0.37 |
|                   | Esophagus                  | 99.26  | 0.07 | 79.88  | 0.14 | 35.77  | 0.30        | 26.34  | 0.22 |
|                   | Large Intestine            | 128.22 | 0.09 | 98.72  | 0.18 | 48.69  | 0.41        | 23.30  | 0.19 |
|                   | Large Intestine (contents) | 3.45   | 0.00 | 175.69 | 0.32 | 68.99  | 0.58        | 22.99  | 0.19 |
|                   | Oral Mucosa                | 133.19 | 0.09 | 176.97 | 0.32 | 38.78  | 0.32        | 10.19  | 0.09 |
|                   | Small Intestine            | 202.34 | 0.14 | 77.22  | 0.14 | 26.21  | 0.22        | 9.78   | 0.08 |
|                   | Small Intestine (contents) | 111.54 | 0.08 | 398.64 | 0.72 | 42.03  | 0.35        | 22.05  | 0.18 |
|                   | Stomach (gastric mucosa)   | 296.90 | 0.20 | 195.44 | 0.35 | 99.67  | 0.83        | 56.13  | 0.47 |
|                   | Stomach (contents)         | 2.97   | 0.00 | 6.96   | 0.01 | 23.27  | 0.19        | 8.02   | 0.07 |
| Tumor             | Total                      | 78.38  | 0.05 | 141.46 | 0.26 | 102.94 | 0.86        | 118.62 | 0.99 |
|                   | High                       | 53.09  | 0.04 | 234.89 | 0.43 | 231.59 | <b>1.94</b> | 49.18  | 0.41 |
|                   | Low                        | 4.94   | 0.00 | 72.82  | 0.13 | 11.89  | 0.10        | 8.80   | 0.07 |



|         |        |      |        |      |        |             |        |             |
|---------|--------|------|--------|------|--------|-------------|--------|-------------|
| Capsule | 550.02 | 0.38 | 567.56 | 1.03 | 546.77 | <b>4.58</b> | 476.75 | <b>3.99</b> |
|---------|--------|------|--------|------|--------|-------------|--------|-------------|

---

Concentrations are in microgram per gram tissue ( $\mu\text{g equiv/g tissue}$ ), tissue to blood ratio, t/b,. n=1/time point. Ratios.> 1 are indicated in bold. LLOQ = 0.244  $\mu\text{g equiv/g tissue}$ .
